# Supplementary material
Source: publisher site journal article supplement (https://www.degruyterbrill.com/publication/isbn/9783110315707/downloadAsset/9783110315707_Inhaltsverzeichnis.pdf)
Supplement: Supplementary file 1 [file 9783110315707_Inhaltsverzeichnis.pdf]

# Inhaltsverzeichnis

|                                                                                                          |               |
|----------------------------------------------------------------------------------------------------------|---------------|
| <b>1. Wesen und Aufgabenstellung der Ethik .....</b>                                                     | <b>1</b>      |
| 1.1 Ethik und Moral .....                                                                                | 1             |
| 1.1.1 Antike und moderne Ethik .....                                                                     | 3             |
| 1.1.2 Der Standpunkt der Ethik – der Standpunkt der<br>Moral .....                                       | 4             |
| 1.2 Was ist Moral? .....                                                                                 | 7             |
| 1.3 Kennzeichen moralischer Urteile .....                                                                | 8             |
| 1.3.1 Handlungsbezug .....                                                                               | 12            |
| 1.3.2 Kategorizität .....                                                                                | 20            |
| 1.3.3 Anspruch auf Allgemeingültigkeit .....                                                             | 24            |
| 1.3.4 Universalisierbarkeit .....                                                                        | 31            |
| 1.4 Moralische und moralrelevante Urteile .....                                                          | 43            |
| 1.5 Moralische und andere Wertungen .....                                                                | 51            |
| 1.6 Die Aufgaben der Ethik .....                                                                         | 57            |
| <br><b>2. Phänomenologie der Moral und rekonstruktive<br/>Ethik .....</b>                                | <br><b>64</b> |
| 2.1 Ethik als „Grammatik der Moral“ .....                                                                | 64            |
| 2.2 Rekonstruktive Ethik: Beispiele .....                                                                | 67            |
| 2.3 Grenzen der rekonstruktiven Ethik .....                                                              | 73            |
| 2.4 Moderne rekonstruktive Ethik: <i>Principlism</i> und<br>Bernard Gerts zehn „moralische Regeln“ ..... | 77            |
| <br><b>3. Verfahrensethik .....</b>                                                                      | <br><b>84</b> |
| 3.1 Formen der Verfahrensethik .....                                                                     | 84            |
| 3.2 Kasuistische Verfahren .....                                                                         | 90            |
| 3.3 Kohärenztheorien .....                                                                               | 92            |
| 3.4 Konsenstheorien .....                                                                                | 99            |
| 3.5 Verfahrensethiken ohne Verfahren .....                                                               | 105           |
| 3.5.1 Gewissensethik .....                                                                               | 105           |
| 3.5.2 Situationsethik .....                                                                              | 107           |
| 3.5.3 Dezisionismus .....                                                                                | 108           |

|                                                                                                               |     |
|---------------------------------------------------------------------------------------------------------------|-----|
| <b>4. Deontologische Ethik</b> .....                                                                          | 113 |
| 4.1 Was heißt „deontologisch“? .....                                                                          | 113 |
| 4.1.1 Zwei fundamental verschiedene Sichtweisen ..                                                            | 119 |
| 4.1.2 Wie trennscharf ist die Unterscheidung zwischen deontologischer und konsequenzialistischer Ethik? ..... | 122 |
| 4.1.3 Absolute Pflichten – absolute Rechte: ein Privileg der deontologischen Ethik? .....                     | 128 |
| 4.2 Prinzipienmonismus und Prinzipienpluralismus .....                                                        | 133 |
| 4.3 Beispiele für einen deontologischen Prinzipienmonismus .....                                              | 136 |
| 4.3.1 Kants Kategorischer Imperativ .....                                                                     | 136 |
| 4.3.2 Das hypothetische Verallgemeinerungsprinzip von M. G. Singer .....                                      | 154 |
| 4.4 Prinzipienpluralismus .....                                                                               | 158 |
| 4.4.1 Weisen der Rangabstufung von Prinzipien ....                                                            | 163 |
| 4.4.2 Die Lösung moralischer Konflikte aus monistischer und pluralistischer Sicht .....                       | 170 |
| <b>5. Konsequenzialistische Ethik</b> .....                                                                   | 173 |
| 5.1 Was ist Konsequenzialismus? .....                                                                         | 173 |
| 5.1.1 Was wird in konsequenzialistischen Ethiken unter den „Folgen“ einer Handlungen verstanden? .....        | 176 |
| 5.1.2 Welche Arten von Folgen sind für die Handlungsbeurteilung relevant? .....                               | 177 |
| 5.1.3 Nach welchen Maßstäben werden die relevanten Folgen bewertet? .....                                     | 186 |
| 5.1.4 Wie gehen die Folgenbewertungen in die Handlungsbeurteilung ein? .....                                  | 188 |
| 5.2 Primärprinzipien und Sekundärprinzipien ....                                                              | 194 |
| 5.2.1 Anforderungen an Sekundärprinzipien .....                                                               | 199 |
| 5.2.2 Einige Konsequenzen aus der Unterscheidung zwischen Primär- und Sekundärprinzipien ....                 | 209 |

|           |                                                                                                                                            |            |
|-----------|--------------------------------------------------------------------------------------------------------------------------------------------|------------|
| 5.2.3     | Drei Interpretationen von Sekundärprinzipien: Handlungskonsequenzialismus, indirekter Konsequenzialismus und Regelkonsequenzialismus ..... | 211        |
| 5.3       | Der Utilitarismus .....                                                                                                                    | 217        |
| 5.3.1     | Varianten des Utilitarismus: Nutzensummenutilitarismus versus Durchschnittsnutzenutilitarismus .....                                       | 221        |
| 5.3.2     | Glücks- versus Präferenzutilitarismus .....                                                                                                | 224        |
| 5.3.3     | Kritikpunkte am Utilitarismus und Revisionsvorschläge .....                                                                                | 229        |
| <b>6.</b> | <b>Theorien des nicht-moralisch Guten .....</b>                                                                                            | <b>241</b> |
| 6.1       | Dimensionen nicht-moralischer Werte .....                                                                                                  | 242        |
| 6.1.1     | Intrinsische und extrinsische nicht-moralische Werte .....                                                                                 | 242        |
| 6.1.2     | Monistische und pluralistische Axiologien ....                                                                                             | 243        |
| 6.1.3     | Singularistische, partikularistische und universalistische Axiologien .....                                                                | 245        |
| 6.1.4     | Aggregations- und Strukturtheorien nicht-moralischen Werts .....                                                                           | 248        |
| 6.2       | Subjektivistische versus objektivistische Axiologien .....                                                                                 | 251        |
| 6.3       | Der Hedonismus .....                                                                                                                       | 253        |
| 6.3.1     | Subjektivistische Kritik am Hedonismus: Bewertungssouveränität des Subjekts .....                                                          | 259        |
| 6.3.2     | Objektivistische Kritik am Hedonismus: Glücksgütertheorien .....                                                                           | 263        |
| 6.4       | Andere objektivistische Axiologien .....                                                                                                   | 267        |
| 6.4.1     | Menschliches Leben als intrinsischer Wert ....                                                                                             | 268        |
| 6.4.2     | Erkenntniswerte .....                                                                                                                      | 271        |
| 6.4.3     | Kosmische und Naturwerte .....                                                                                                             | 273        |
| <b>7.</b> | <b>Moralische Motivation und moralischer Wert .....</b>                                                                                    | <b>279</b> |
| 7.1       | Moralischer versus nicht-moralischer Wert ...                                                                                              | 279        |

|           |                                                                                                           |            |
|-----------|-----------------------------------------------------------------------------------------------------------|------------|
| 7.2       | Eigentliche und uneigentliche moralische Motive .....                                                     | 281        |
| 7.3       | Moralischer Wert und moralisches Handeln ..                                                               | 285        |
| 7.4       | Moralische Überzeugungen, moralische Motive und moralisches Handeln .....                                 | 289        |
| 7.5       | Tugend und Tugendethik .....                                                                              | 295        |
| 7.5.1     | Moralische, soziale und andere Tugenden .....                                                             | 295        |
| 7.5.2     | Woher kommen Tugenden? .....                                                                              | 298        |
| 7.5.3     | Tugendethik .....                                                                                         | 302        |
| 7.5.4     | Gesinnungsethik .....                                                                                     | 306        |
| 7.6       | Die Herausforderung des psychologischen Egoismus .....                                                    | 312        |
| 7.6.1     | Egoismus und Altruismus .....                                                                             | 312        |
| 7.6.2     | Varianten des psychologischen Egoismus .....                                                              | 317        |
| 7.6.3     | Die Rolle von Sanktionen .....                                                                            | 323        |
| 7.6.4     | Egoistische Gründe für die Moral .....                                                                    | 326        |
| 7.7       | Der ethische Egoismus .....                                                                               | 331        |
| <b>8.</b> | <b>Die Sprache der Moral .....</b>                                                                        | <b>335</b> |
| 8.1       | Drei Konzeptionen der Bedeutung moralischer Urteile: Deskriptivismus, Emotivismus, Präskriptivismus ..... | 335        |
| 8.2       | Deskriptivismus: Modelle der Objektivierung moralischer Urteile .....                                     | 337        |
| 8.3       | Emotivismus .....                                                                                         | 344        |
| 8.4       | Präskriptivismus .....                                                                                    | 348        |
| <b>9.</b> | <b>Gibt es moralisches Wissen? .....</b>                                                                  | <b>354</b> |
| 9.1       | Gibt es moralische Wahrheit? Der ethische Realismus .....                                                 | 357        |
| 9.2       | Der metaethische Naturalismus und seine Kritik .....                                                      | 360        |
| 9.3       | Andere Formen des metaethischen Naturalismus .....                                                        | 369        |

|                                 |                                                             |            |
|---------------------------------|-------------------------------------------------------------|------------|
| 9.3.1                           | Konsens und Kohärenz als Quellen moralischer Wahrheit ..... | 369        |
| 9.3.2                           | Starke religiöse Moralbegründung .....                      | 371        |
| 9.3.3                           | Schwache religiöse Moralbegründung .....                    | 374        |
| 9.4                             | Der Intuitionismus .....                                    | 381        |
| 9.4.1                           | Intuitionen und Intuitionismus .....                        | 381        |
| 9.4.2                           | Missverständnisse des ethischen Intuitionismus .....        | 385        |
| 9.4.3                           | Kritik am Intuitionismus .....                              | 389        |
| 9.5                             | Der ethische Relativismus .....                             | 397        |
| 9.6                             | Zwischen Realismus und Relativismus: die Minimalethik ..... | 398        |
| <b>10.</b>                      | <b>Moralbegründung ohne Erkenntnisanspruch .....</b>        | <b>406</b> |
| 10.1                            | Universalisierungsprinzip .....                             | 409        |
| 10.2                            | Glaubwürdiger Allgemeingültigkeitsanspruch .....            | 411        |
| 10.2.1                          | Unparteilichkeit .....                                      | 413        |
| 10.2.2                          | Umfassende Interessenberücksichtigung .....                 | 417        |
| 10.3                            | Kohärenz .....                                              | 424        |
| <b>Glossar</b> .....            |                                                             | <b>427</b> |
| <b>Literaturnachweise</b> ..... |                                                             | <b>442</b> |
| <b>Namenregister</b> .....      |                                                             | <b>453</b> |
| <b>Sachregister</b> .....       |                                                             | <b>457</b> |
